# Supplementary material for: Study of MDM2 as Prognostic Biomarker in Brain-LGG Cancer and Bioactive Phytochemicals Inhibit the p53-MDM2 Pathway: A Computational Drug Development Approach
Source: MDPI journal article supplement (doi:10.3390/molecules28072977), 2023-03-27
Supplement: s1 [file s1]

**Supplementary Table S1:** Transcription levels of *MDM2* gene between different subtypes of Brain Lower Grade Glioma (LGG) Cancer and normal individuals using the Oncomine database.

| <b>Dataset</b>        | <b>Brain Cancer Subtype</b>           | <b>P-value</b> | <b>Fold change</b> | <b>t-test</b> | <b>Gene Rank (%)</b> |
|-----------------------|---------------------------------------|----------------|--------------------|---------------|----------------------|
| <b>Murat Brain</b>    | Glioblastoma (80)                     | 1.22E-8        | 2.523              | 7.331         | 3%                   |
| <b>Bredel Brain 2</b> | Glioblastoma (27)                     | 6.85E-5        | 2.269              | 5.040         | 8%                   |
| <b>Watson Brain</b>   | Meningioma (15)                       | 0.131          | 1.740              | 1.357         | 28%                  |
| <b>Liang Brain</b>    | Oligoastrocytoma (3)                  | 0.026          | 1.417              | 2.811         | 7%                   |
|                       | Glioblastoma (30)                     | 0.02           | 1.488              | 3.798         | 12%                  |
| <b>Lee Brain</b>      | Glioblastoma (22)                     | 7.67E-4        | 6.131              | 6.040         | 7%                   |
| <b>Rickman Brain</b>  | Astrocytoma (45)                      | 0.182          | 1.147              | 0.947         | 35%                  |
| <b>Pomeroy Brain</b>  | Desmoplastic Medulloblastoma (14)     | 0.184          | 4.415              | 1.020         | 37%                  |
|                       | Malignant Glioma, NOS (10)            | 0.261          | 2.096              | 0.679         | 44%                  |
|                       | Atypical Terapoid/Rhabdoid Tumor (50) | 0.187          | 4.228              | 1.028         | 46%                  |
|                       | Classic Medulloblastoma (46)          | 0.401          | 1.468              | 0.272         | 52%                  |
| <b>Sun Brain</b>      | Glioblastoma (81)                     | 2.82E-8        | 1.674              | 5.873         | 11%                  |
|                       | Oligodendroglioma (50)                | 7.92E-4        | 1.284              | 3.288         | 17%                  |
|                       | Diffuse Astrocytoma (7)               | 0.040          | 1.396              | 1.904         | 21%                  |
|                       | Anaplastic Astrocytoma (19)           | 0.019          | 1.147              | 2.152         | 26%                  |
| <b>TCGA Brain</b>     | Brain Glioblastoma (542)              | 1.65E-5        | 1.341              | 5.128         | 22%                  |
|                       | Glioblastoma (5)                      | 0.297          | 1.145              | 0.573         | 395                  |
| <b>Shai Brain</b>     | Oligodendroglioma (3)                 | 0.120          | 1.078              | 1.430         | 32%                  |
|                       | Glioblastoma (27)                     | 0.069          | 1.051              | 1.576         | 34%                  |
|                       | Astrocytoma (5)                       | 0.549          | -1.008             | -0.127        | 56%                  |

|                        |                                   |          |        |        |     |
|------------------------|-----------------------------------|----------|--------|--------|-----|
| <b>Beroukhim Brain</b> | Primary Glioblastoma (106)        | 0.008    | 1.105  | 2.454  | 15% |
|                        | Secondary Glioblastoma (15)       | 0.048    | 1.028  | 1.727  | 23% |
|                        | Anaplastic Oligodendroglioma (7)  | 0.393    | 1.005  | 0.273  | 40% |
|                        | Anaplastic Astrocytoma (9)        | 0.851    | -1.055 | -1.110 | 82% |
| <b>French Brain</b>    | Anaplastic Oligodendroglioma (23) | 0.001    | 1.590  | 3.625  | 15% |
|                        | Anaplastic Oligodendroglioma (4)  | 0.090    | 2.202  | 1.702  | 31% |
| <b>Gutmann Brain</b>   | Pilocytic Astrocytoma             | 0.274    | 1.700  | 0.694  | 38% |
| <b>TCGA Brain 2</b>    | Brain Glioblastoma (582)          | 1.49E-13 | 1.128  | 7.469  | 26% |
|                        | Glioblastoma (29)                 | 0.156    | 1.083  | 1.081  | 29% |
|                        | Brain Astrocytoma (63)            | 0.493    | 1.000  | 0.019  | 57% |
|                        | Oligoastrocytoma (54)             | 0.765    | -1.005 | -0.727 | 61% |
|                        | Brain Oligodendroglioma (89)      | 0.133    | 1.010  | 1.121  | 67% |
|                        | Malignant Glioma, NOS (14)        | 0.805    | -1.022 | -0.889 | 74% |

**Supplementary Table S2:** Differential expression pattern analysis of *MDM2* in Brain Lower Grade Glioma (LGG) Cancer based on different variables and different stages where the comparison was made between normal vs different stages of cancer using UALCAN database. *P*-value in bold denotes statistically significant values.

| Variables             | Different stages  | N   | Comparisons                    | Statistical significance |
|-----------------------|-------------------|-----|--------------------------------|--------------------------|
| <b>Patient's race</b> | Caucasian         | 474 | Caucasian-vs- African American | 8.138000E-01             |
|                       | African- American | 21  | Caucasian-vs-Asian             | 2.419600E-01             |

|                             |                   |     |                                       |              |
|-----------------------------|-------------------|-----|---------------------------------------|--------------|
|                             | Asian             | 8   | African American –vs- Asian           | 1.609420E-01 |
| <b>Patients gender</b>      | Male              | 285 | Male-vs-female                        | 9.919200E-01 |
|                             | Female            | 229 |                                       |              |
| <b>Patient's age</b>        | 21-40 Yrs.        | 243 | Age(21-40Yrs)-vs-Age(41-60Yrs)        | 3.551800E-02 |
|                             | 41-60 Yrs.        | 200 | Age(21-40Yrs)-vs-Age(61-80Yrs)        | 1.855590E-01 |
|                             | 61-80 Yrs.        | 60  | Age(21-40Yrs)-vs-Age(81-100Yrs)       | N/A          |
|                             | 81-100 Yrs.       | 1   | N/A                                   | N/A          |
| <b>Tumor grade</b>          | Grade 2           | 248 | Grade 2-vs-Grade 3                    | 1.294290E-02 |
|                             | Grade 3           | 265 |                                       |              |
| <b>Histological subtype</b> | Astrocytoma       | 194 | Astrocytoma-vs-Oligoastrocytoma       | 1.494230E-01 |
|                             | Oligoastrocytoma  | 130 | Astrocytoma-vs-Oligodendroglioma      | 3.175000E-01 |
|                             | Oligodendroglioma | 191 | Oligoastrocytoma-vs-Oligodendroglioma | 8.741500E-03 |
| <b>TP53 mutation status</b> | TP53-Mutant       | 230 | TP53-Mutant-vs- TP53-NonMutant        | 1.524250E-03 |
|                             | TP53-NonMutant    | 282 |                                       |              |

**Supplementary Table S3:** Promoter methylation level of *MDM2* in Brain Lower Grade Glioma (LGG) Cancer based on different variables and in a comparison between normal vs different stages of cancer from UALCAN database. *P*-value in bold denotes statistically significant values.

| <b>Variables</b>      | <b>Different stages</b> | <b>N</b> | <b>Comparisons</b>             | <b>Statistical significance</b> |
|-----------------------|-------------------------|----------|--------------------------------|---------------------------------|
| <b>Patient's race</b> | Caucasian               | 474      | Caucasian-vs- African American | 8.839000E-01                    |
|                       | African- American       | 21       | Caucasian-vs-Asian             | 5.540000E-01                    |

|                             |                |     |                                 |              |
|-----------------------------|----------------|-----|---------------------------------|--------------|
|                             | Asian          | 8   | African American –vs- Asian     | 5.359600E-01 |
| <b>Patients gender</b>      | Male           | 285 | Male-vs-female                  | 9.695200E-01 |
|                             | Female         | 230 |                                 |              |
| <b>Patient's age</b>        | 21-40 Yrs.     | 244 | Age(21-40Yrs)-vs-Age(41-60Yrs)  | 8.842800E-01 |
|                             | 41-60 Yrs.     | 200 | Age(21-40Yrs)-vs-Age(61-80Yrs)  | 9.494200E-01 |
|                             | 61-80 Yrs.     | 60  | Age(21-40Yrs)-vs-Age(81-100Yrs) | N/A          |
|                             | 81-100 Yrs.    | 1   | N/A                             | N/A          |
| <b>TP53 mutation status</b> | TP53-Mutant    | 231 | TP53-Mutant-vs- TP53-NonMutant  | 6.480800E-01 |
|                             | TP53-NonMutant | 282 |                                 |              |

**Supplementary Table S4:** Positively correlated genes of *MDM2* genes responsible for the progression of Brain Lower Grade Glioma (LGG) Cancer.

| <b>GEPIA</b>       |            | <b>UALCAN</b>      |            |
|--------------------|------------|--------------------|------------|
| <b>Gene Symbol</b> | <b>PCC</b> | <b>Gene Symbol</b> | <b>PCC</b> |
| RP11-61102.3       | 0.86       | YEATS4             | 0.92       |
| RP11-61102.5       | 0.8        | CNOT2              | 0.91       |
| SLC35E3            | 0.6        | CCT2               | 0.91       |
| METTL1             | 0.58       | FRS2               | 0.9        |
| CDK4               | 0.55       | PTPRB              | 0.89       |
| NUP107             | 0.52       | FAM119B            | 0.8        |

|           |      |              |      |
|-----------|------|--------------|------|
| TSPAN31   | 0.52 | RAB3IP       | 0.73 |
| METTL21B  | 0.52 | TSFM         | 0.71 |
| AGAP2-AS1 | 0.48 | METTL1       | 0.59 |
| OS9       | 0.48 | TSPAN31      | 0.58 |
|           |      | LOC100130776 | 0.52 |
|           |      | CDK4         | 0.49 |

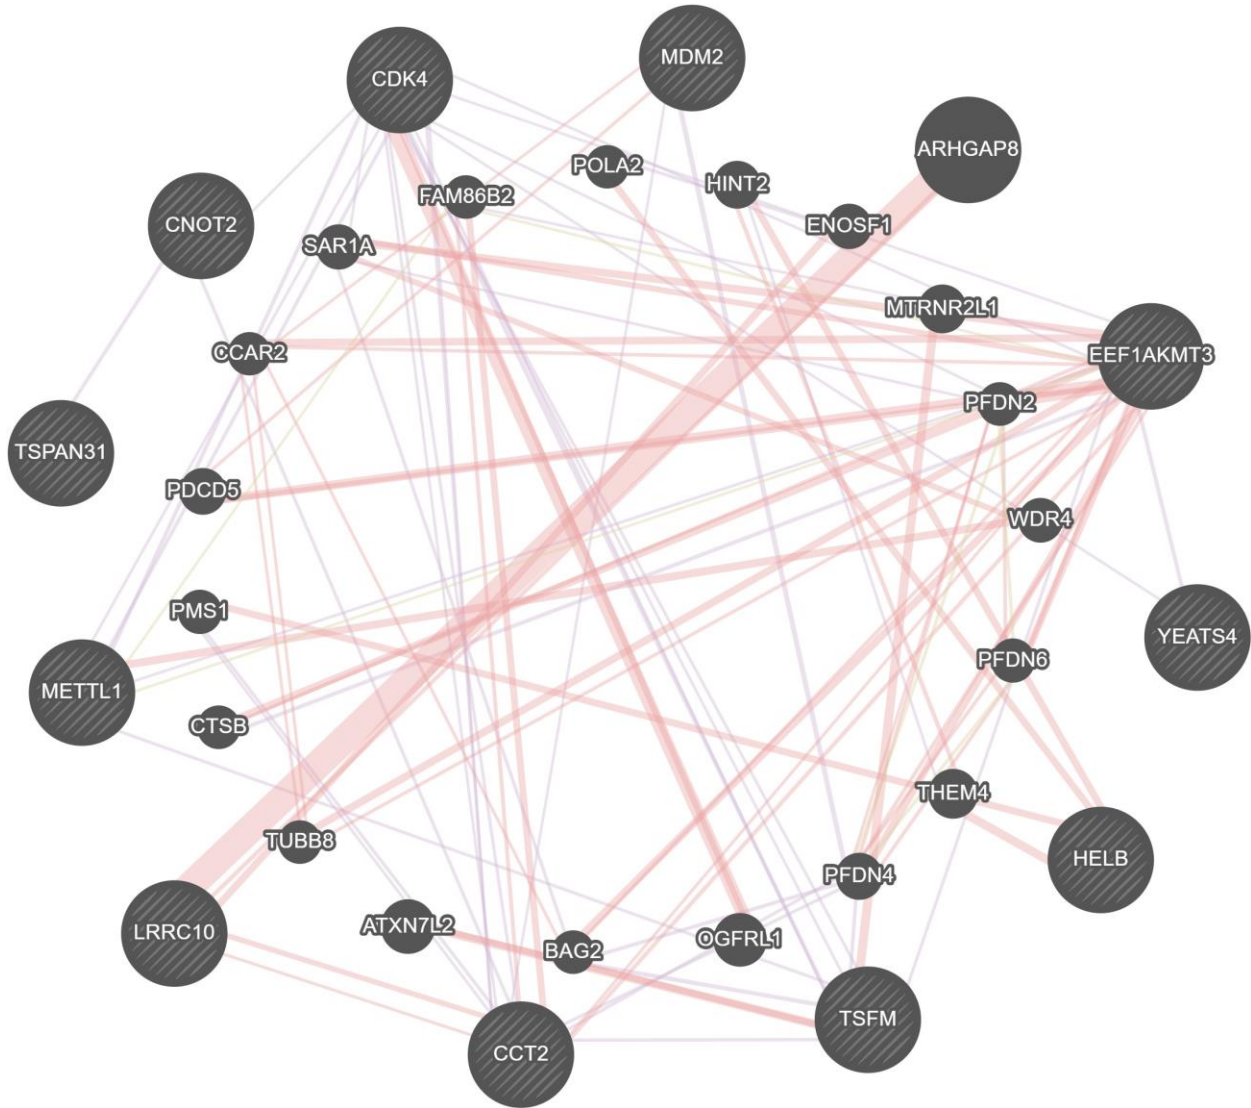

**Supplementary Figure S1:** The protein-protein interaction network of *MDM2* with the positively correlated genes of Brain Lower Grade Glioma Cancer (LGG).

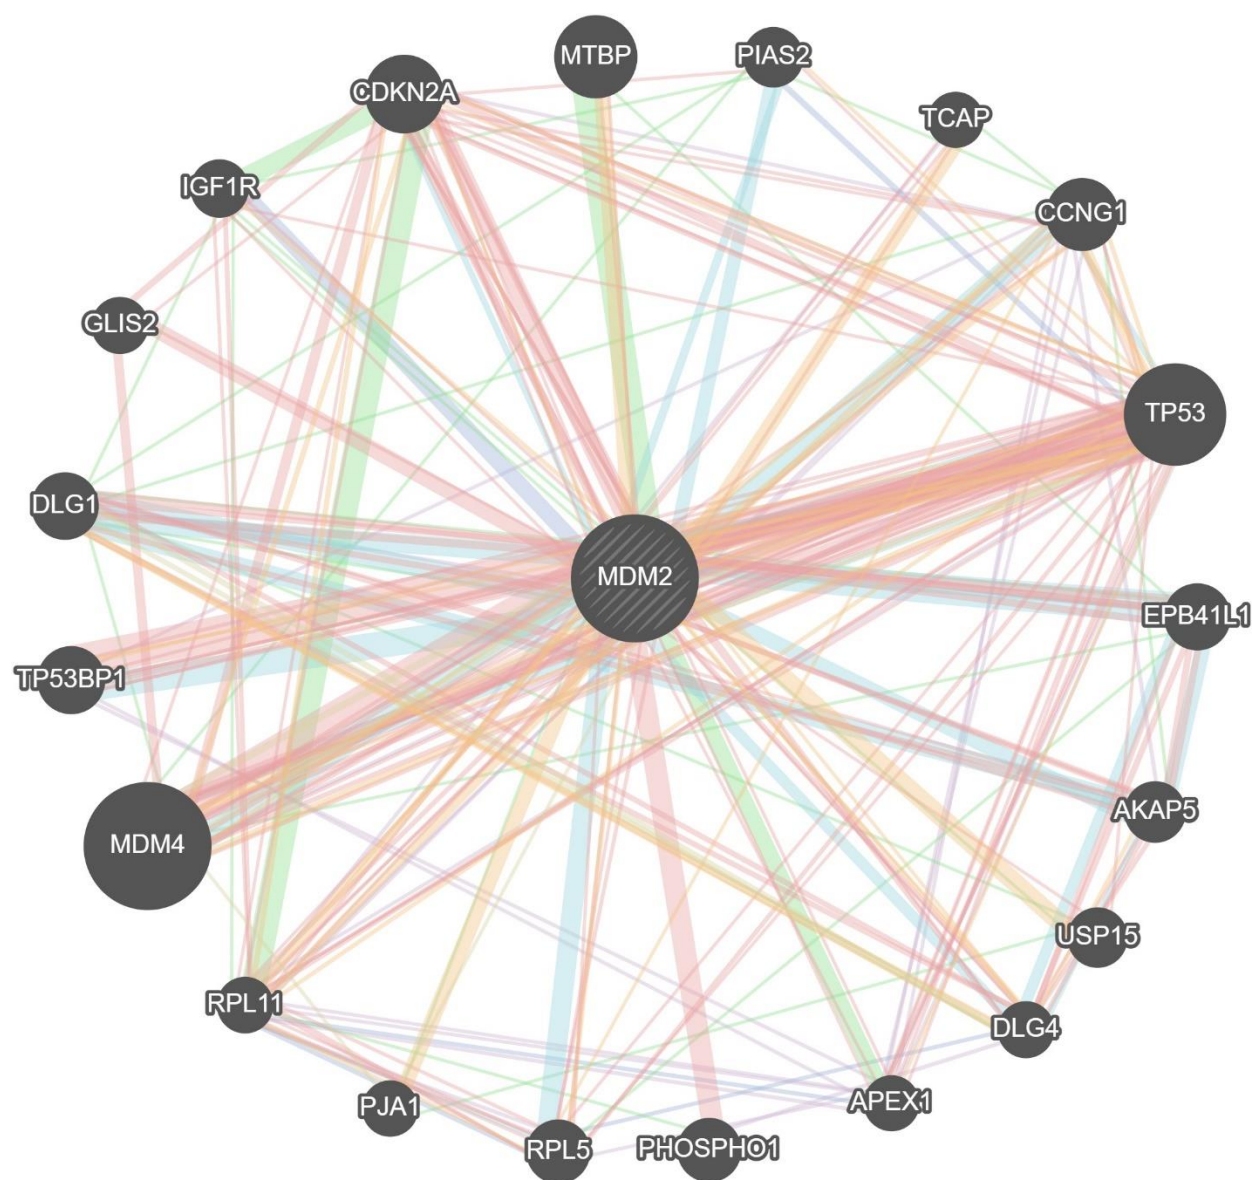

**Supplementary Figure S2:** The correlation network of *MDM2* with its effectively interacted gene have been represented based on its physical and genetic interconnections, co-expression, co-localization, interaction pathways and estimated protein domains.
